# Supplementary material for: How to use Donath-Landsteiner test to diagnose paroxysmal cold haemoglobinuria (PCH)
Source: HighWire-hosted journal article supplement (doi:10.1136/archdischild-2020-319568), 2021-08-25

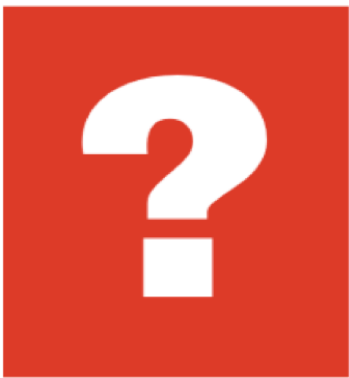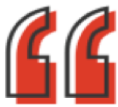

# How to assess and manage autoimmune haemolytic anaemia

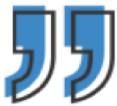

**How do you spot children with haemolytic anaemia?** Children with jaundice, pallor and passing cola – colour urine; may be shocked

**Initial Investigations for AIHA:** FBC, U+E, SBR (split), LFTs, reticulocytes, Group+DAT, film, LDH, haptoglobins, Infectious disease screen.

**DAT+ve for C3:**  
D-L test

**What is the Donath-Landsteiner (D-L) test?**  
Looks for the D-L (IgG) antibody that binds to P antigen of RBCs & fixes complement at low temperatures: then activates complement at core temperatures (37°C) causing red cell lysis .

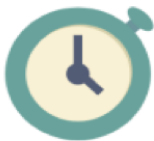

**Time taken for test:** 24hr. Needs 2ml blood, kept at 37°C in thermoflask.: pre-warn the labs. Cost ~£108

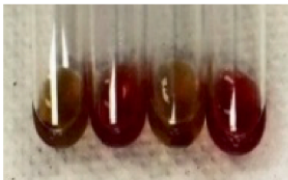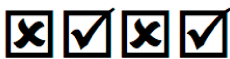

**Test:** After centrifuging patient’s blood (37°C), Reagent P antigen positive group O RBC and donor serum (complement source ) added. Sample split to 4tubes. Tube 1 at 37°C (90min) Tube 2: ice for 30min,then 37°C (60min). Tube3 (with 1%papain to expose more RBC P antigen) 37°C for 90min. Tube 4 (with 1%papain) : ice for 30min,then 37°C (60min).

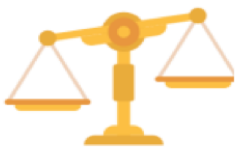

**Result :** A positive D-L test ☒ occurs when haemolysis has occurred: tube 2&4 (ice then 37°C) and tubes 1&3 are negative ☐. This confirms PCH.

## Real-world results:

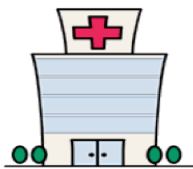

Largest study (n=52 patients with PCH): 51 patients had positive D-L test, in 4 patients the significance of the positive test was unclear. Similar results from smaller case-series.

## Clinical uncertainties

**False negatives:** when D-L antibody only at low levels.

**False positives:** Patient with cold agglutinins and IgM with I specificity (2% of patients with cold agglutinins)

**Other issues:** Identifies PCH but not the trigger.

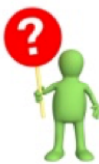

Supplement: archdischild-2020-319568supp001_data_supplement.pdf [file archdischild-2020-319568supp001_data_supplement.pdf]
